# Supplementary material for: Effect of Genotype and Maternal Affective Disorder on Intronic Methylation of FK506 Binding Protein 5 in Cord Blood DNA
Source: Front Genet. 2018 Dec 17;9:648. doi: 10.3389/fgene.2018.00648 (PMC6305129; doi:10.3389/fgene.2018.00648)
Supplement: Table S3 — Pyrosequencing data for the discovery set. [file Table_3.xlsx]

## Sheet: Sheet1
Supplementary Table 3: Pyrosequencing Data for the Discovery Set
		1=exposed to maternal affective disorder, 0=unexposed									Empty cells denote CpGs where data had been excluded due to poor signal.
			Promoter																		Intron 1									Intron 2
UCSC HG19 Coordinates			35657180	35657202	35657327	35657337	35657357	35657385	35657394	35657401	35657415	35657446	35657486	35657488	35657490	35657493	35657506	35657528	35657562	35657570	35655608	35655614	35655632	35655647	35655659	35655664	35655671	35655696	35655700	35605303	35605309	35605385	35605389	35605395	35605460	35605474	35605485	35605528	35605530	35605534	35606441	35606484	35606615	35606662	35607855	35607903	35607968	35608021	35609664
	Genotype	Case Status	CpG-1	CpG-2	CpG-3	CpG-4	CpG-5	CpG-6	CpG-7	CpG-8	CpG-9	CpG-10	CpG-11	CpG-12	CpG-13	CpG-14	CpG-15	CpG-16	CpG-17	CpG-18	CpG-1	CpG-2	CpG-3	CpG-4	CpG-5	CpG-6	CpG-7	CpG-8	CpG-9	CpG-1	CpG-2	CpG-3	CpG-4	CpG-5	CpG-6	CpG-7	CpG-8	CpG-9	CpG-10	CpG-11	CpG-12	CpG-13	CpG-14	CpG-15	CpG-16	CpG-17	CpG-18	CpG-19	CpG-20
1	CC	1			59.5	100	92.51														0	7.63	3.92	1.54	2.6	2.58	1.25	0.77	1.66	99.35	99.17	97.37	94.96	100	97.93	97.83	93.97	99.18	99.18	100	77.94	98.77	84.13	99.19	99.37	100	91.51	84.3	95.01
2	CT	1	83.37	73.67	77.05	100	94.08	98.22	95.32	89.81	100	97.02	50.26	64.11	49.75	77.98	86.79	92.72	98.57	83.06	1.09	6.12	5.17	1.93	4.72	1.96	1.13	0.54	1.47	97.64	98.73	94.71	95.49	91.13	96.09	100	99.94	99.69	99.24	100	95.71	98.15	76.99	95.89	97.95	95.77	83.75	81.11	97.61
3	CT	1	56.15	84.45	63.1	100	86.83	97.82	81.66	90.19	100	100	43.47	66.62	49.29	79.68	85.01	98.53	100	87.63	0.62	2.11	5.19	1.65	3.44	1.09	0.81	3.36	2.66	96.32	99.05	97.1	94.64	96.73	95.79	100	99.63	98.48	98.49	100	94.96	92.74	82.66	94.36	98.02	99.65	86.07	82.67	99.46
4	CT	1	73.99	71.27	63.74	100	78.74	92.71	92.81	91.33	100	95.08	54.77	75.71	58.42	85.53	95.43	99.57	88.36	78.7	2.78	2.76	6.11	2.97	3.85	1.57	3.04	0.69	2.33	97.41	97.46	94.63	90.5	100	93.44	97.69	95.26	99.87	97.91	100	91.5	93.49	78.75	93.01	92.45	93.57	83.55	86.02	99.23
5	CC	1	63.92	83.36	70.2	100	87.42	93.13	95	84.95	100	98.08	46.79	65.95	51.72	77.75	88.85	96.51	97.63	90.34	0	3.84	8.18	1.54	3.91	1.94	1.49	2.01	1.79	96.96	97.87	93.22	93.37	94.79	98.03	100	92.58	94.39	96.08	100	88.03	94.63	82.11	92.82	92.77	100	85.3	80.62	96.32
6	CT	1	77.72	85.76	68.92	100	90.08	96.01	94.37	89.36	100	100	44.5	63.86	53.67	76.55	96.12	96.69	92.51	86.87	1.45	3.44	7.4	2.49	4.21	2.27	1.35	0.53	1.99	98.08	95.57	95.28	94.28	100	96.27	98.52	97.49	97.47	97.86	100	86.83	99.78	81.58	95.02	96.14	96.8	89.91	86.15	96.52
7	CT	1	57.37	76.27	62.85	100	92.92	97.66	93.51	88.27	100	99.44	46.17	66.46	49.75	78.59	94	99.48	95.06	89.19	3.11	1.88	3.25	1.97	2.67	2.13	0.89	0	2.98	99.45	99.73	96.33	92.7	97.01	96.69	100	100	100	96.7	100	96.13	88.67	72.77	84.42	91.6	91.3	89.08	85.33	95.06
8	TT	1	76.42	73.57	64.8	89.56	80.13	91.14	90.16	92.59	100	96.86	44.72	65.86	49.55	77.25	86.94	96.65	96.43	91.19	1.79	3.8	6.55	2.67	3.4	1.79	1.54	0.77	2.25	98.39	100	96.02	55.52	100	92.61	99.17	99.05	95.54	98.99	100	91.5	100	85.41	96.34	93.28	95.82	89.2	81.75	96.5
9	CT	1	60.49	96.03	53.28	100	79.23	79.67	81.79	78.35	100										1.34	2.02	3.51	1.08	2.77	2	1.61	0.89	1.14	86.9	100	84.99	82.3	83.6	100	100	98.54	87.93	99.09	100	93.44	96.4	93.59	98.09	88.56	99.94	84.09	82.9	90.41
10	CC	1	56.71	74.08	67.46	84.21	76.85	90.6	94.05	88.3	100	96.03	38.84	60.79	47.9	71.12	90.25	91.5	95.22	91.07	1.47	2.85	6.77	1.17	3.76	1.16	1.25	1.26	2.03	94.95	96.7	94.69	90.68	97.33	98.73	100	100	98.78	98.62	100	90.62	97.28	77.08	90.84	95.77	98.9	86.83	83.96	97.05
11	CT	1	68.9	86.2	77.86	87.99	92.68	85.86	72.66	91.64	100	100	43.44	62.53	53.49	75.23	98.53	98.5	99.52	93.84	2.9	2.73	5.22	1.73	2.46	1.79	1.37	0	1.26	99.19	100	94.38	94.95	98.23	98.88	100	100	98.02	99.05	100	93.47	93.36	73.62	85.22	94.36	97.31	84.28	83.95	95.74
12	CC	1	73.61	86.89	73.52	87.75	80.13	93.79	92.06	89.92	100	100	66.46	84.94	62.68	84.78	85.87	98.25	98.79	93.95	0	3.1	5.79	2.09	3.23	1.18	1.11	1.36	2.2	97.73	98.58	95.91	95.64	100	98.91	100	100	100	96.91	100	92.51	100	85.63	95.29	97.55	98.51	88.77	87.14	99.25
13	CC	1	57.32	50.91	62.66	100	80.47	100	89.21	91.44	100	93.27	50.46	75.68	51.34	84.33	88.19	89.18	96.28	92.14	1.77	4.35	6.66	3.32	3.73	2.49	1.45	0	1.8	97.29	100	93.15	93.75	100	92.99	100	97.84	96.3	91.41	100	89.22	92.97	85.64	95.29	94.94	93.63	85.89	83.37	93.31
14	CC	1	56.9	73.13	62.88	95.69	87.12	99.64	89.65	86.19	100	97.27	42.26	60.84	50.66	73.38	89.99	98.52	94.37	88.78	0.88	2.74	3.25	1.28	3.5	1.19	1.31	1.03	2.54	98.29	97.91	92.49	91.43	94.36	92.86	100	95.4	100	98.64	100	90.77	98.21	73.94	90.85	94.22	93.31	87.47	78	96.34
15	CC	1	67.89	75.81	70.74	97.76	91.11	97.2	95.94	91.23	100	100	50.65	74.53	57.36	83.85	69.18	93.99	98.35	91.45	2.13	2.67	6.51	2.32	4.15	1.5	1.82	0.4	1.93	98.38	99.55	96.92	95.01	100	98.25	100	99.17	100	98.46	100	87.23	97.06	81.85	90.68	93.79	98.42	90.37	84.68	97.55
16	TT	1	72.78	53.93	70.18	93.48	73.46	96.95	94.85	33.14	100	98.87	51.48	73.84	52.58	84.43	77.42	87.58	97.35	53.95	0.74	2.09	4.83	1.55	4.81	1.13	1.06	0	1.26	99.07	98.76	97.64	93.96	99.36	98.8	100	94.67	98.91	99.27	100	90.82	97.93	82.7	75.85	94.67	100	83.64	80.02	91.6
17	CC	0	59.07	77.03	86.75	93.54	92.92	93.02	95.96	77.07	100	89.7	45.08	72.54	53.96	76.78	88.6	100	100	80.26	1.38	2.03	21.07	1.81	2.85	1.45	6.62	0.5	1.57	95.74	94.64	95.63	89.86	93.51	100	94.7	100	96.15	98.53	100	96.35	95.55	83.37	86.12	90.47	98.07	92.11	87.66	97.61
18	TT	0	71.61	85.17	84.69	91.55	84.67	94.81	94.15	82.86	100	98.95	50.3	71.84	54.26	82.52	90.76	90.31	100	90.3	2.57	2.4	5.72	1.36	5.79	1.76	2.2	1.68	1.49	98.54	92.17	96.53	91.57	98.61	97.74	100	100	100	95.61	100	96.18	99.7	76.71	91.39	95.56	96.47	87.32	85.07	97.42
19	CT	0	62.86	64.98	76.81	93.28	74.29	91.05	93.56	87.37	100	100	48.05	69.07	52.48	83.89	86.98	100	100	97.04	0	2.42	6.25	1	3.38	1.4	1.66	0	2.6	99.12	96.82	97.03	93.4	96.81	88.01	100	97.88	93.14	97.88	100	93.39	94.81	79.7	91.11	97.52	95.06	83.99	80.95	97.14
20	CC	0	52.31	73.15	54.84	100	90.22	94.62	84.73	90.1	100	100	42.65	69.82	52.11	77.31	94.53	95.35	98.01	93.81	1.33	2.97	1.85	1.69	3.31	1.53	1.45	0	1.62	96.1	92.54	95.74	95.76	100	93.84	100	100	100	96.4	100	89.13	97.67	74.17	89.66	96.33	100	83.92	85.78	96.14
21	CC	0	29.14	60.61	59.71	71.48	72.43	90.57	94.03	90.94	100	98.89	40.88	69.06	45.93	81.28	85.09	97.63	97.75	92.84	0	2.45	4.81	0	3.93	1.64	1.76	0.72	1.4	100	97.1	88.08	90.18	99.85	96.07	100	100	91.4	95.88	100	94.11	94.65	77.01	93.66	93.2	96.83	90.42	85.78	96.9
22	TT	0	64.13	80.57	84.14	100	72.16	95.8	94.58	73.16	100	93.71	66.76	88.08	63.68	94.13	97.74	100	94.86	92.38	1.41	4.79	6.65	1.03	4.23	1.32	1.56	1.03	1.62	94.05	99.54	89.85	92.18	98.95	95.19	97.89	100	99.16	98.41	100	94.63	94.67	79.64	91.94	95.95	98.75	87.93	81.38	96.29
23	CT	0	58.88	83.9	55.59	96.25	84.65	100	95.68	90.67	100	89.72	44.9	67.76	52.5	79.65	87.11	94.68	97.97	88.26	0	2.63	2.28	0.77	2.46	0.92	2.39	0.84	1.66	96.98	97.88	97.06	94.15	92.81	98.48	100	100	96.58	98.39	100	90.26	95.37	77.18	93.17	93.7	98.17	90.19	86.77	95.95
24	CT	0	87.45	76.25	76.33	95.28	88.97	99.33	92.44	87.92	100	87.99	64.07	76.61	64.61	87.61	92.31	90.73	98.23	92.41	0.88	3.24	5.19	2.76	4.52	1.48	1.88	0.77	1.85	99.04	96.44	93.07	89.87	98.65	94.69	100	97.18	94.87	96.25	100	92.1	96.57	75.52	92.96	94.4	98.66	87.57	83.88	95.59
25	CC	0	86.96	82.1	85.02	100	94.84	97.85	95.29	90.77	94.51	84.32	56.61	75.26	61.13	85.35	100	99.28	98.25	94.8	3.79	4.03	6.47	1.58	2.62	2.87	1.55	0.7	2.71	95.7	100	94.05	92.37	91.48	98.82	100	99.99	87.22	98.27	100	93.08	99.19	81.34	92.77	94.04	98.81	87.11	80.97	91.94
26	CT	0	69.17	75.07	68.57	86.48	84.49	98.24	93.39	82.19	100	98.53	56.61	77.87	59.32	88.03	88.93	93.35	100	92.98	2.23	4.48	7.76	2.11	4.03	2.32	2.5	1.13	1.35	98.72	100	94.1	91.97	97.63	98.53	96.52	99.88	100	97.47	100	93.48	95.98	65.6	89.45	97.11	95.47	86.37	83.17	97.19
27	CC	0	76.39	81.56	72.24	100	91.23	100	93.7	90.51	100	98.12	45.93	66.44	53.99	80.6	93.27	98.19	100	94.78	1.34	3.06	7.32	2.13	3.18	1.98	1.64	0.83	1.78	93.44	97.17	96.08	92.67	97.78	98.57	100	100	97.23	96.28	82.6	89.92	95.14	77	93.85	96.79	93.57	86.88	86.66	97.24
28	CC	0	38.44	52	55.54	100	83.52	100	84.36	90.34	100	94.03	36.14	60.11	42.14	78.55	77.46	87.06	78.39	85.93	0	3.55	6.48	0	2.9	0	0	0	1.37	98.85	97.88	90.43	85.43	89.88	89.03	96.3	93.99	96.07	96.1	100	80.42	91.78	74.21	89.57	96.26	96.01	82.5	73.08	90.53
29	CT	0	73.29	80.4	70.79	86.55	76.22	91.66	93.68	89.53	100	94.48	45.12	63.78	52.65	73.97	88.37	88.42	95.08	91.98	1.51	2.2	7.04	2.31	5.65	1.74	1.49	0.56	1.7	91.25	87.31	78.66	44.24	86.07	87.72	93.47	100	93.83	94.74	99.94	89.26	98.68	75.01	90.3	94.42	94.57	87.73	87.06	95.82
30	CC	0	66.55	73.53	57.78	100	88.95	96.36	91.82	88.93	100	100	49.19	65.36	54.52	83.31	86.33	87.5	100	91.47	0.64	2.72	5.89	1.58	3.97	1.2	0.96	0	1.33	96.68	98.06	96.24	95.11	100	98.28	100	97.49	99.97	99.04	100	96.19	97.27	84.11	91.52	94.2	99.59	86.96	84.51	96.93
31	TT	0	86.41	82.77	67.34	100	87.19	93.52	93.38	77.38	100	95.32	49.23	67.8	56.73	79.47	89.34	98.96	97.41	91.98	2.28	2.26	5.33	1.72	2.58	1.23	1.11	0.85	1.68	99.21	95.46	94.66	92.69	99	97.38	98.53	99.98	100	99.07	100	90.22	93.66	79.29	88.36	95.3	86.47	79.79	84.69	97.45
32	TT	0	53.75	85.69	83.38	100	92.88	97.22	92.87	87.64	100	100	36.8	68.38	50.77	78.99	94	100	100	91.46	1.51	3.22	7.29	1.29	6.61	1.21	2.05	1.51	1.39	98.9	98.3	95.42	94.41	96.17	95.21	100	100	99.85	98.71	100	96.45	97.47	80.4	98.52	95.18	96.4	87.64	89.37	98.76
		MAX	87.45	96.03	86.75	100	94.84	100	95.96	92.59	100	100	66.76	88.08	64.61	94.13	100	100	100	97.04	3.79	7.63	21.07	3.32	6.61	2.87	6.62	3.36	2.98	100	100	97.64	95.76	100	100	100	100	100	99.27	100	96.45	100	93.59	99.19	99.37	100	92.11	89.37	99.46
		MEDIAN	66.55	76.27	68.745	100	86.975	96.01	93.51	89.36	100	98.1	46.48	68.09	52.615	79.665	88.89	96.67	97.99	91.455	1.36	2.805	6	1.67	3.615	1.55	1.49	0.745	1.69	97.905	97.985	94.995	92.695	98.005	97.035	100	99.91	98.63	98.33	100	91.8	96.485	79.465	92.355	94.805	97.07	87.035	84.13	96.51
		MIN	29.14	50.91	53.28	71.48	72.16	79.67	72.66	33.14	94.51	84.32	36.14	60.11	42.14	71.12	69.18	87.06	78.39	53.95	0	1.88	1.85	0	2.46	0	0	0	1.14	86.9	87.31	78.66	44.24	83.6	87.72	93.47	92.58	87.22	91.41	82.6	77.94	88.67	65.6	75.85	88.56	86.47	79.79	73.08	90.41
[truncated: 18 more columns]
